# Supplementary material for: Surface-Enhance Raman Spectroscopy Detection of Thiabendazole in Frozen Food Products: The Case of Blueberries and Their Extracts
Source: MDPI journal article supplement (doi:10.3390/chemosensors11090505), 2023-09-17
Supplement: s1 [file s1]

# Surface-Enhance Raman Spectroscopy Detection of Thiabendazole in Frozen Food Products: The Case of Blueberries and Their Extracts

Csilla Müller Molnár <sup>1,2,\*</sup>, Camelia Berghian-Groșan <sup>1</sup>, Dana Alina Măgdaș <sup>1</sup> and Simona Cîntă Pînzaru <sup>2,\*</sup>

<sup>1</sup> National Institute for Research and Development of Isotopic and Molecular Technologies, 67-103 Donath, 400293 Cluj-Napoca, Romania; camelia.grosan@itim-cj.ro (C.B.-G.); alina.magdas@itim-cj.ro (D.A.M.)

<sup>2</sup> Biomolecular Physics Department, Faculty of Physics, Babeș-Bolyai University, Kogălniceanu 1, 400084 Cluj-Napoca, Romania

\* Correspondence: csilla.molnar@itim-cj.ro (C.M.M.); simona.pinzaru@ubbcluj.ro (S.C.P.)

**Table S1.** Detection of pesticides from fruits and vegetables using SERS substrates.

| Pesticides                                           | SERS substrates [ref.]                                                               | Limit of detection                     | Observation                                            |
|------------------------------------------------------|--------------------------------------------------------------------------------------|----------------------------------------|--------------------------------------------------------|
| Parathion-methyl, thiram, chlorpyrifos               | Au NPs [35]                                                                          | 2.6, 0.24, 3.51 ng/cm <sup>2</sup>     | Apple, orange peels                                    |
|                                                      | Au@Ag NPs [36]                                                                       | 0.025~7.23 ng/cm <sup>2</sup>          | Apple, grape, mango, pear, peach peels                 |
| Thiram, 4-polychlorinated biphenyl, methyl parathion | Ag-NC@PE composite film [37]                                                         | 10 nM, 1 μM, 10 nM                     | Orange surface                                         |
| Thiram                                               | Au NPs grafted on dendritic α-Fe <sub>2</sub> O <sub>3</sub> [38]                    | 5×10 <sup>-6</sup> M                   | Apple peels                                            |
|                                                      | TiO <sub>2</sub> supported silver Nanoparticles [39]                                 | 240 ng/cm <sup>2</sup>                 |                                                        |
|                                                      | Ag nanoshells (Ag NSs) [40]                                                          | 38 ng/cm <sup>2</sup>                  |                                                        |
|                                                      | Fe <sub>3</sub> O <sub>4</sub> @NRs [41]                                             | 10 <sup>-7</sup> M                     |                                                        |
|                                                      | AgNRs embedded PDMS [42]                                                             | 2.4×10 <sup>-9</sup> g/cm <sup>2</sup> |                                                        |
| Thiabendazole                                        | Au nanostar/ polydimethylsiloxane (PDMS) film [43]                                   | 20 ppb                                 | Apple skin                                             |
|                                                      | Ag dendrites [44]                                                                    | 5 ppm μg/g per weight                  | Apples (Gala)                                          |
|                                                      | Cellulose nanofibers coated with Ag NPs [45]                                         | 5 ppm                                  | Apples                                                 |
|                                                      | Ag nanoparticles [27]                                                                | 10 <sup>-11</sup> mol l <sup>-1</sup>  | Orange, grapefruit, lemon, bio lemon, and banana peels |
|                                                      | electrochemically (EC) roughened, gold-based screen-printed electrodes (AuSPEs) [46] | 0.061 ppm                              | Apple juice                                            |
|                                                      | metal liquid-like 3D plasmonic arrays on O/W interface [47]                          | 0.1 ppm                                | Fresh juice                                            |
|                                                      | novel gold nanomaterial-based substrates [48]                                        | 149, 216, and 179 μg/L                 | lemon, carrot, and mango juice                         |
|                                                      |                                                                                      |                                        |                                                        |
| Acetamiprid                                          | Ag dendrites/swab method [49]                                                        | 0.125 μg/cm <sup>2</sup>               | Apple surfaces                                         |
| Carbaryl                                             | Au-coated Klarite [50]                                                               | 0.5 μg/g                               | Apples (Fuji)                                          |
|                                                      | Au nanopopcorn [51]                                                                  | 0.35 mg/kg                             | Pear surface                                           |

|                     |                                    |                    |                       |
|---------------------|------------------------------------|--------------------|-----------------------|
| <b>Chlorpyrifos</b> | Ag <sub>2</sub> O@Ag NPs/PMMA [52] | 10 <sup>-7</sup> M | Apple peels           |
|                     | Au NPs [53]                        | 0.13 mg/kg         | Apples (Fuji) surface |

**Table S2.** The proposed assignment of SERS peaks of frozen blueberry extracts.

| <b>Anthocyanidins pH4 *</b> | <b>Blueberry</b> | <b>Blueberry filtered with bentonite</b> | <b>Assignments [25]</b> |
|-----------------------------|------------------|------------------------------------------|-------------------------|
| <b>1639 (s)</b>             | 1633 (s)         | 1640 (s)                                 | v (CC)                  |
| <b>1594 (s)</b>             | 1591 (s)         | 1592 (w)                                 | v (CC)                  |
| <b>1528 (s)</b>             | 1527 (vs)        | 1523 (s)                                 | v (CC)                  |
| <b>1496</b>                 | 1490 (s)         | 1480 (s)                                 | v (CC)                  |
| <b>1325 (s)</b>             | 1322 (m)         | 1324 (m)                                 | v (CC); i; δ (CH)       |
|                             | 1281 (s)         | 1287 (m)                                 |                         |
| <b>1247 (s)</b>             | 1241(vs)         | 1244 (w)                                 | v (CO)                  |
| <b>1194 (s)</b>             | 1195 (s)         | 1193 (m)                                 | δ (OH)                  |
| <b>1082</b>                 | 1083 (m)         | 1082 (w)                                 |                         |
| <b>870 (m)</b>              | 867 (s)          | 862 (m)                                  | γ (CH)                  |
| <b>710 (s)</b>              | 713 (s)          | 718 (w)                                  |                         |
| <b>649 (s)</b>              | 643 (s)          | 649 (w)                                  |                         |
| <b>539 (s)</b>              | 541 (m)          | 541 (m)                                  | δ (CC)                  |

\* Data from reference from Yaffino et al. [25].

**Table S3.** The proposed assignment of the main Raman and SERS bands of TBZ on the hydroxylamine-reduced AgNPs [19, 26-28].

| <b>Solid /cm-1</b> | <b>SERS - Ag (cm-1)</b> | <b>Vibrational assignments</b>          |
|--------------------|-------------------------|-----------------------------------------|
| <b>778 (w)</b>     | 778 (vs)                | v (C-S) and breathing mode of pentaring |
| <b>1010 (w)</b>    | 1005 (vs)               | δ(C-H) in-plane                         |
| <b>1276 (m)</b>    | 1275 (w)                | uring + δ(CH) in-plane                  |
| <b>1300 (w)</b>    | 1318 (w)                | δ(C-H) in-plane                         |
| <b>1398 (vw)</b>   | 1400 (m)                | v (C-C)                                 |
| <b>1453 (m)</b>    | 1452 (w)                | v (C-N)                                 |
| <b>1490 (w)</b>    | 1489 (w)                | v(C=C) + δ(N-H) in-plane                |
| <b>1575 (vs)</b>   | 1571 (vs)               | v(C=N)                                  |
| <b>1590 (m)</b>    | 1592 (w)                | v(C=N)                                  |
| <b>1619 (w)</b>    | 1618 (m)                | v(C=N)                                  |

Note: vs = very strong; s = strong; m = medium; w = weak; v = stretching, δ = bending

## References

- Chen, J.; Huang, Y.; Kannan, P.; Zhang, L.; Lin, Z.; Zhang, J.; Chen, T.; Guo, L. Flexible and Adhesive Surface Enhance Raman Scattering Active Tape for Rapid Detection of Pesticide Residues in Fruits and Vegetables. *Anal. Chem.* **2016**, *88*, 2149–2155, doi:10.1021/acs.analchem.5b03735.
- Liu, B.; Han, G.; Zhang, Z.; Liu, R.; Jiang, C.; Wang, S.; Han, M.Y. Shell Thickness-Dependent Raman Enhancement for Rapid Identification and Detection of Pesticide Residues at Fruit Peels. *Anal. Chem.* **2012**, *84*, 255–261, doi:10.1021/ac202452t.
- Zhou, N.; Meng, G.; Huang, Z.; Ke, Y.; Zhou, Q.; Hu, X. A Flexible Transparent Ag-NC@PE Film as a Cut-and-Paste SERS Substrate for Rapid: In Situ Detection of Organic Pollutants. *Analyst* **2016**, *141*, 5864–5869, doi:10.1039/c6an00807k.
- Tang, X.; Cai, W.; Yang, L.; Liu, J. Highly Uniform and Optical Visualization of SERS Substrate for Pesticide Analysis Based on Au Nanoparticles Grafted on Dendritic α-Fe 2O3. *Nanoscale* **2013**, *5*, 11193–11199, doi:10.1039/c3nr03671e.
- Dai, H.; Sun, Y.; Ni, P.; Lu, W.; Jiang, S.; Wang, Y.; Li, Z.; Li, Z. Three-Dimensional TiO2 Supported Silver Nanoparticles as Sensitive and UV-Cleanable Substrate for Surface Enhanced Raman Scattering. *Sensors Actuators, B Chem.* **2017**, *242*, 260–268, doi:10.1016/j.snb.2016.10.085.

40. Yang, J.K.; Kang, H.; Lee, H.; Jo, A.; Jeong, S.; Jeon, S.J.; Kim, H.I.; Lee, H.Y.; Jeong, D.H.; Kim, J.H.; et al. Single-Step and Rapid Growth of Silver Nanoshells as SERS-Active Nanostructures for Label-Free Detection of Pesticides. *ACS Appl. Mater. Interfaces* **2014**, *6*, 12541–12549, doi:10.1021/am502435x.
41. Tang, X.; Dong, R.; Yang, L.; Liu, J. Fabrication of Au Nanorod-Coated Fe<sub>3</sub>O<sub>4</sub> Microspheres as SERS Substrate for Pesticide Analysis by near-Infrared Excitation. *J. Raman Spectrosc.* **2015**, *46*, 470–475, doi:10.1002/jrs.4658.
42. Kumar, S.; Goel, P.; Singh, J.P. Flexible and Robust SERS Active Substrates for Conformal Rapid Detection of Pesticide Residues from Fruits. *Sensors Actuators B Chem.* **2017**, *241*, 577–583, doi:10.1016/J.SNB.2016.10.106.
43. Shiohara, A.; Langer, J.; Polavarapu, L.; Liz-Marzán, L.M. Solution Processed Polydimethylsiloxane/Gold Nanostar Flexible Substrates for Plasmonic Sensing. *Nanoscale* **2014**, *6*, 9817–9823, doi:10.1039/c4nr02648a.
44. He, L.; Chen, T.; Labuza, T.P. Recovery and Quantitative Detection of Thiabendazole on Apples Using a Surface Swab Capture Method Followed by Surface-Enhanced Raman Spectroscopy. *Food Chem.* **2014**, *148*, 42–46, doi:10.1016/j.foodchem.2013.10.023.
45. Liou, P.; Nayigiziki, F.X.; Kong, F.; Mustapha, A.; Lin, M. Cellulose Nanofibers Coated with Silver Nanoparticles as a SERS Platform for Detection of Pesticides in Apples. *Carbohydr. Polym.* **2017**, *157*, 643–650, doi:10.1016/J.CARBPOL.2016.10.031.
46. Moldovan, R.; Milenko, K.; Vereshchagina, E.; Iacob, B.C.; Schneider, K.; Farcău, C.; Bodoki, E. EC-SERS Detection of Thiabendazole in Apple Juice Using Activated Screen-Printed Electrodes. *Food Chem.* **2023**, *405*, doi:10.1016/j.foodchem.2022.134713.
47. Tian, L.; Su, M.; Yu, F.; Xu, Y.; Li, X.; Li, L.; Liu, H.; Tan, W. Liquid-State Quantitative SERS Analyzer on Self-Ordered Metal Liquid-like Plasmonic Arrays. *Nat. Commun.* **2018**, *9*, doi:10.1038/s41467-018-05920-z.
48. Alsammarraie, F.K.; Lin, M.; Mustapha, A.; Lin, H.; Chen, X.; Chen, Y.; Wang, H.; Huang, M. Rapid Determination of Thiabendazole in Juice by SERS Coupled with Novel Gold Nanosubstrates. *Food Chem.* **2018**, *259*, 219–225, doi:10.1016/j.foodchem.2018.03.105.
49. Wijaya, W.; Pang, S.; Labuza, T.P.; He, L. Rapid Detection of Acetamiprid in Foods Using Surface-Enhanced Raman Spectroscopy (SERS). *J. Food Sci.* **2014**, *79*, 1–5, doi:10.1111/1750-3841.12391.
50. Fan, Y.; Lai, K.; Rasco, B.A.; Huang, Y. Determination of Carbaryl Pesticide in Fuji Apples Using Surface-Enhanced Raman Spectroscopy Coupled with Multivariate Analysis. *Lwt* **2015**, *60*, 352–357, doi:10.1016/j.lwt.2014.08.011.
51. Xu, Q.; Guo, X.; Xu, L.; Ying, Y.; Wu, Y.; Wen, Y.; Yang, H. Template-Free Synthesis of SERS-Active Gold Nanopopcorn for Rapid Detection of Chlorpyrifos Residues. *Sensors Actuators, B Chem.* **2017**, *241*, 1008–1013, doi:10.1016/j.snb.2016.11.021.
52. Li, C.; Yang, C.; Xu, S.; Zhang, C.; Li, Z.; Liu, X.; Jiang, S.; Huo, Y.; Liu, A.; Man, B. Ag<sub>2</sub>O@Ag Core-Shell Structure on PMMA as Low-Cost and Ultra-Sensitive Flexible Surface-Enhanced Raman Scattering Substrate. *J. Alloys Compd.* **2017**, *695*, 1677–1684, doi:10.1016/j.jallcom.2016.10.317.
53. Zhai, C.; Li, Y.Y.; Peng, Y.K.; Xu, T.F. Detection of Chlorpyrifos in Apples Using Gold Nanoparticles Based on Surface Enhanced Raman Spectroscopy. *Int. J. Agric. Biol. Eng.* **2015**, *8*, 113–120, doi:10.3965/j.ijabe.20150805.1771.
